# Supplementary material for: Depletion of extracellular asparagine impairs self-reactive T cells and ameliorates autoimmunity in a murine model of multiple sclerosis
Source: eLife journal article supplement (doi:10.7554/elife.107745), 2025-09-12
Supplement: fig2-data3 [file elife-107745-fig2-data3-v1.pdf]

STRATAGENE

STRATAGENE

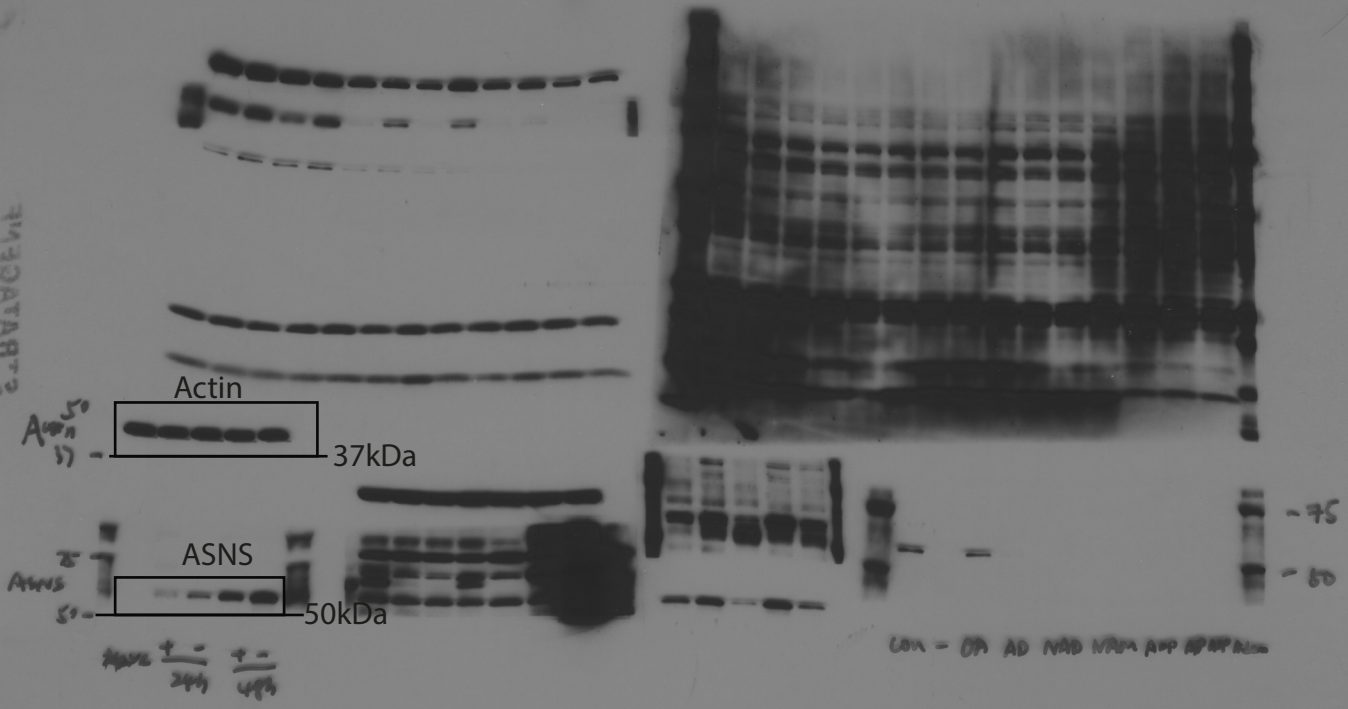

02 of 14

VI + - + -

b-pota

4.11

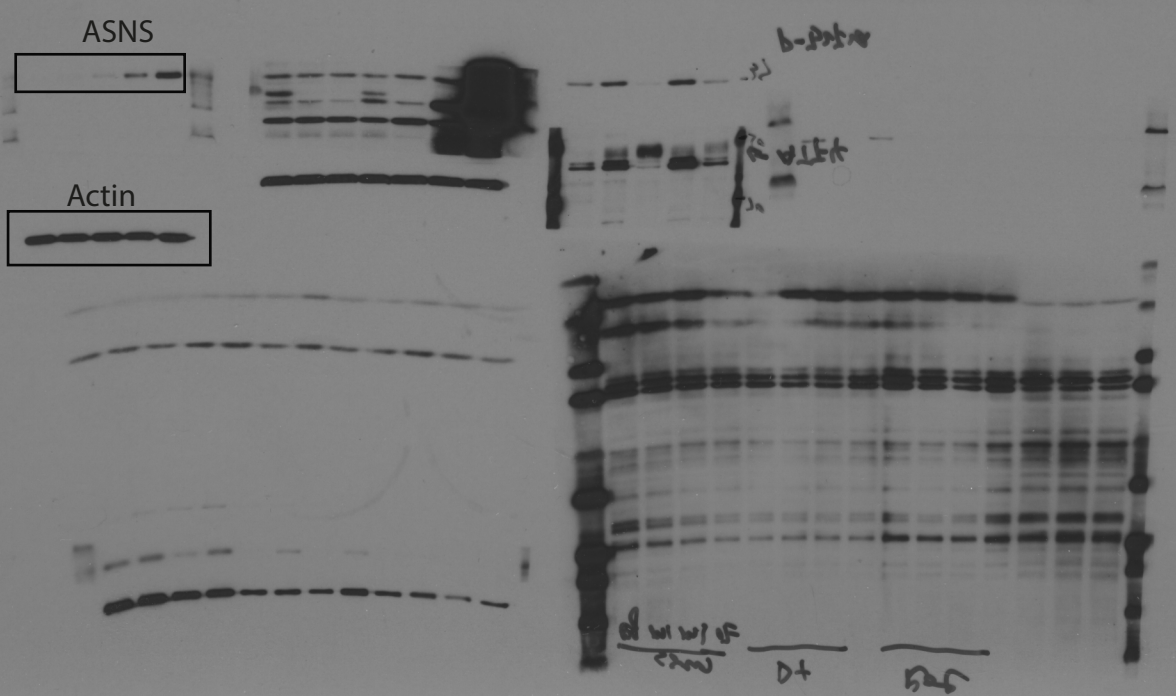

50 100 200 400 800
