# Supplementary material for: Depletion of extracellular asparagine impairs self-reactive T cells and ameliorates autoimmunity in a murine model of multiple sclerosis
Source: eLife. 2026 Jul 8;14:RP107745. doi: 10.7554/eLife.107745 (PMC13345630; doi:10.7554/eLife.107745)
Supplement: Figure 1—figure supplement 1—source data 1. [file elife-107745-fig1-figsupp1-data1.xlsx]

## Sheet: 1A
PD-1 MFI
RPMI	Low NEAA	Low Arg	Low Asn	Low Asp	Low Glu	Low Gln	Low Gly	Low Pro	Low Ser	Low Tyr
697	359	622	373	788	735	443	730	791	702	777
728	321	622	378	669	748	463	801	764	681	864
665	309	610	377	599	764	464	685	810	752	914

## Sheet: 1B
Activation Marker Frequency
Asn Concentration	CD25	CD44	CD69	CD71	PD-1
3.78 mM	95.3	59.9	96.9	86.6	26.5
	95.6	60.5	97.5	89.1	26.1
	97.3	64.5	98.8	92.1	29.4
378 uM	97.3	67.4	98.1	92.5	33.7
	97.9	67.2	98.9	93.3	32.3
	96.6	65.4	97.7	90.6	31.3
37.8 uM	97.9	56.9	98.8	82.1	35.9
	98.4	58.4	99	84.8	39.4
	96.3	58.7	97.3	81.3	40.2
3.78 uM	85.5	15.8	95.7	12.4	10.9
	90	16.2	98.6	13.6	11.3
	90.6	17.6	99	14.5	14
378 nM	86.8	12.9	98.6	12.5	10.2
	88.4	13.8	98.8	11.7	10.7
	89.6	12.8	99	11.1	9.34
37.8 nM	87.5	11.1	98.9	11.1	9.07
	88.2	12.9	98.9	11.8	10.1
	88.4	14.7	99.1	12.7	10.2

## Sheet: 1C
Activation Marker Frequency
Asn Concentration	CD25	CD44	CD69	CD71	PD-1
3.78 mM	99	58.8	99.8	95.9	31.4
	98.9	59.5	99.9	96.5	30.7
	99.1	62	99.8	97.1	31.6
378 uM	98.9	62.6	99.7	96.7	34.6
	98.9	65.3	99.8	97.2	41.5
	99.2	61.7	99.7	96.7	33.8
37.8 uM	99.2	53.2	99.7	92.5	36.1
	99.3	54.6	99.8	93	36.1
	99.4	52.9	99.8	92.5	36.4
3.78 uM	94.4	12.6	99.9	16.9	9.3
	94.3	13.5	99.7	18.6	9.44
	90.7	12.3	99.6	18.4	8.87
378 nM	91.2	11.5	99.6	14.9	8.06
	91.7	10.3	99.7	15.3	8.2
	92.4	10.1	99.9	15.4	7.86
37.8 nM	91.9	10.6	99.7	15.4	7.82
	90.8	9.65	99.7	14.5	6.7
	93	9.42	99.6	14.8	7.22

## Sheet: 1D
Frequency CD44+ Cells
RPMI	Asn-Deficient RPMI	RPMI + 10U/L PEG-AsnASE
89.98	78.41	73.35
90.39	78.49	74.69
92.19	82.81	80.34
87.59	72.84	69.74
92.4	86.01	83.21
89.87	74.29	71.65
90.7	76.34	74.47
88.61	72.5	72.1
88.09	77.64	75.06
88.44	77.4	74.48

## Sheet: 1E
Frequency CD25+ Cells
RPMI	Asn-Deficient RPMI	RPMI + 10U/L PEG-AsnASE
85.65	79.61	63.86
81.9	74.98	64.41
79.78	77.54	67.46
84.53	79.63	73.81
75.86	69.2	58.19
95.01	62.48	45.12
94.37	74.4	66.71
91.52	69.5	56.6
87.72	74.43	63.93
86.02	69.32	62.19

## Sheet: 1F
Frequency CD69+ Cells
RPMI	Asn-Deficient RPMI	RPMI + 10U/L PEG-AsnASE
98.93	89.45	72.63
96.19	83.71	72.73
93.78	85.74	75.74
94.15	86.68	80.91
86.93	77.33	66.02
98.23	65.52	47.54
97.98	76.99	70.18
95.44	72.02	59.32
91.55	78.24	68.56
89.64	72.05	65.33

## Sheet: 1G
MFI CD69
RPMI	Asn-Deficient RPMI	RPMI + 10U/L PEG-AsnASE
29310.2	23748.7	11883
26666.1	19789.1	11217.5
24798.9	22174.2	13233.4
26324.2	23360	16419.6
24104.8	17885.9	9351.7
35384.8	8753.67	3814.2
30766.7	14310.5	9152.96
30296.7	12163.5	5996.68
27712.2	16509.4	9104.32
29784.1	13997.1	8761.24

## Sheet: 1H
Frequency PD-1+ Cells
RPMI	Asn-Deficient RPMI	RPMI + 10U/L PEG-AsnASE
99.08	86.17	69.06
96.1	79.18	68.02
94.44	82.73	71.86
94.77	83.78	77.44
86.33	72.61	60.81
96.33	57.22	38.61
96.49	69.9	57.2
93.59	65.66	49.18
89.59	66.58	50.61
87.87	62.01	50.43

## Sheet: 1I
MFI PD-1
RPMI	Asn-Deficient RPMI	RPMI + 10U/L PEG-AsnASE
7504.24	1361.01	787.13
5930.74	1063.93	710.92
6175.61	1151.95	802.86
6187.85	1373.04	1071.61
4326.02	987.58	656.29
4615.56	756.46	501.62
4838.31	1071.28	740.4
4608.34	968.52	640.99
3870.48	948.1	641.1
3455.36	906.01	654.6

## Sheet: 1J
Frequency Viable CD4+ Cells
RPMI	Asn-Deficient RPMI	RPMI + 10U/L PEG-AsnASE
93.31	48.5	48.39
95.11	37.5	40.29
93.24	42.32	54
90.55	45.14	49.68
88.12	51.32	64.95
94.48	65.92	56.93
94.45	70.38	54.34
93.36	68	52.64
94.01	66.23	58.88
93.78	71.06	62.72

[truncated: 1 more sheets: 1K]
