# Supplementary material for: Depletion of extracellular asparagine impairs self-reactive T cells and ameliorates autoimmunity in a murine model of multiple sclerosis
Source: eLife. 2026 Jul 8;14:RP107745. doi: 10.7554/eLife.107745 (PMC13345630; doi:10.7554/eLife.107745)
Supplement: Figure 1—source data 1. [file elife-107745-fig1-data1.xlsx]

## Sheet: 1C
Division Index
DMEM	Asn	Ala	Asp	Glu	Pro
0.11	1.44	0.13	0.1	0.11	0.16
0.1	1.49	0.12	0.14	0.11	0.12
0.15	1.45	0.098	0.14	0.11	0.13

## Sheet: 1D
PD-1+ Frequency
DMEM	Asn	Ala	Asp	Glu	Pro
11.9	52.8	14.7	12.5	15.3	15.4
13.1	51.4	13.9	14.2	14.6	14.7
14.3	52.1	13.2	15	14	13.8

## Sheet: 1E
PD-1+ MFI
DMEM	Asn	Ala	Asp	Glu	Pro
782	892	788	762	793	789
796	882	786	772	789	807
823	871	777	800	769	781

## Sheet: 1F
CD44+ Frequency
DMEM	Asn	Ala	Asp	Glu	Pro
15.2	64.3	18.4	15.8	17	18.3
17.3	63.9	18.5	17.1	18.4	17.8
18.3	63.3	19.1	17.9	17.5	16.5

## Sheet: 1G
CD44+ MFI
DMEM	Asn	Ala	Asp	Glu	Pro
1741	3058	1709	1693	1738	1741
1709	3022	1728	1709	1712	1689
1738	2963	1696	1674	1670	1712

## Sheet: 1H
CD25+ Frequency
DMEM	Asn	Ala	Asp	Glu	Pro
22.5	89.9	19.2	19.6	18.3	19.9
24.2	90.4	19.1	21.9	18	18.7
22	89.5	18.9	21.6	19.9	17

## Sheet: 1I
CD25+ MFI
DMEM	Asn	Ala	Asp	Glu	Pro
2419	4623	2442	2424	2452	2428
2447	4614	2424	2447	2447	2524
2424	4556	2466	2433	2428	2447

## Sheet: 1J
CD44 MFI
RPMI	Low NEAA	Low Arg	Low Asn	Low Asp	Low Glu	Low Gln	Low Gly	Low Pro	Low Ser	Low Tyr
7003	4316	6559	4509	6866	6792	5580	7317	7765	6377	7003
7496	4361	6531	4435	6777	6645	5799	7646	6866	6146	7921
7381	4371	6516	4566	6488	6616	5592	7189	7463	7333	8543

## Sheet: 1K
CD25 MFI
RPMI	NEAA	Arg	Asn	Asp	Glu	Gln	Gly	Pro	Ser	Tyr
11273	4556	9773	5050	13638	10747	5521	13235	15206	12073	12698
12815	3847	9470	4955	12993	10995	5887	15241	13296	12240	15746
12353	4108	9929	5147	10747	11273	5762	12101	14086	14054	17286

## Sheet: 1L
Frequency Viable CD4+ Cells 24 hr
RPMI	Asn-Deficient RPMI	RPMI + 10U/L PEG-AsnASE
87.63	87.94	86.74
83.99	88.06	86.15
82.09	88.74	86.85
87.64	90.49	89.89
87.13	90.49	89.19
84.07	85.59	87.93
82.55	82.49	86.44
83.53	88.22	86.55
86.22	89.87	90.7
89.18	91.12	91.62

[truncated: 3 more sheets: 1M, 1N, 1P]
