# Supplementary material for: Depletion of extracellular asparagine impairs self-reactive T cells and ameliorates autoimmunity in a murine model of multiple sclerosis
Source: eLife. 2026 Jul 8;14:RP107745. doi: 10.7554/eLife.107745 (PMC13345630; doi:10.7554/eLife.107745)
Supplement: Figure 2—figure supplement 1—source data 1. [file elife-107745-fig2-figsupp1-data1.xlsx]

## Sheet: 2A
Frequency CD25+ Cells
Samples	Frequency
Activation_AsnASE_12HR_M	85.35
Activation_AsnASE_12HR_M	84.54
Activation_AsnASE_12HR_M	72.68
Activation_AsnASE_12HR_M	78.6
Activation_AsnASE_12HR_M	76.98
Activation_AsnASE_24HR_M	88.73
Activation_AsnASE_24HR_M	84.46
Activation_AsnASE_24HR_M	77.28
Activation_AsnASE_24HR_M	81.39
Activation_AsnASE_24HR_M	81.91
Activation_AsnASE_36HR_M	86.58
Activation_AsnASE_36HR_M	84.68
Activation_AsnASE_36HR_M	75.56
Activation_AsnASE_36HR_M	81.04
Activation_AsnASE_36HR_M	85.18
Activation_AsnASE_6HR_M1	81.52
Activation_AsnASE_6HR_M2	75.51
Activation_AsnASE_6HR_M3	74.25
Activation_AsnASE_6HR_M4	75.65
Activation_AsnASE_6HR_M5	79.98
Activation_AsnASE_start_M1	69.77
Activation_AsnASE_start_M2	65.8
Activation_AsnASE_start_M3	61.06
Activation_AsnASE_start_M4	62.85
Activation_AsnASE_start_M5	50
Activation_Asparagine_Defici	64.64
Activation_Asparagine_Defici	58.83
Activation_Asparagine_Defici	60.69
Activation_Asparagine_Defici	58.06
Activation_Asparagine_Defici	40
Activation_RPMI_M1.fcs	84.44
Activation_RPMI_M2.fcs	87.37
Activation_RPMI_M3.fcs	85.56
Activation_RPMI_M4.fcs	86.68
Activation_RPMI_M5.fcs	89.27

## Sheet: 2B
Frequency of PD-1+ Cells
Samples	Frequency
Activation_AsnASE_12HR_M1.fcs	75
Activation_AsnASE_12HR_M2.fcs	76.55
Activation_AsnASE_12HR_M3.fcs	56.28
Activation_AsnASE_12HR_M4.fcs	66.7
Activation_AsnASE_12HR_M5.fcs	61.69
Activation_AsnASE_24HR_M1.fcs	80.48
Activation_AsnASE_24HR_M2.fcs	79.24
Activation_AsnASE_24HR_M3.fcs	64.49
Activation_AsnASE_24HR_M4.fcs	70.54
Activation_AsnASE_24HR_M5.fcs	66.75
Activation_AsnASE_36HR_M1.fcs	77.73
Activation_AsnASE_36HR_M2.fcs	76.14
Activation_AsnASE_36HR_M3.fcs	58.2
Activation_AsnASE_36HR_M4.fcs	67.58
Activation_AsnASE_36HR_M5.fcs	72.57
Activation_AsnASE_6HR_M1.fcs	72.31
Activation_AsnASE_6HR_M2.fcs	70.63
Activation_AsnASE_6HR_M3.fcs	54.12
Activation_AsnASE_6HR_M4.fcs	62.73
Activation_AsnASE_6HR_M5.fcs	64.27
Activation_AsnASE_start_M1.fcs	40.54
Activation_AsnASE_start_M2.fcs	40.57
Activation_AsnASE_start_M3.fcs	29.15
Activation_AsnASE_start_M4.fcs	33.84
Activation_AsnASE_start_M5.fcs	25
Activation_Asparagine_Deficient_RPMI_M1.fcs	34.28
Activation_Asparagine_Deficient_RPMI_M2.fcs	31.56
Activation_Asparagine_Deficient_RPMI_M3.fcs	24.89
Activation_Asparagine_Deficient_RPMI_M4.fcs	29.62
Activation_Asparagine_Deficient_RPMI_M5.fcs	26.67
Activation_RPMI_M1.fcs	80.3
Activation_RPMI_M2.fcs	87.48
Activation_RPMI_M3.fcs	70.95
Activation_RPMI_M4.fcs	78.94
Activation_RPMI_M5.fcs	81.47

## Sheet: 2C
Frequency of CD44+ Cells
Sample	Frequency
Activation_AsnASE_12HR_M1.fcs	92.52
Activation_AsnASE_12HR_M2.fcs	90
Activation_AsnASE_12HR_M3.fcs	88.55
Activation_AsnASE_12HR_M4.fcs	90.99
Activation_AsnASE_12HR_M5.fcs	91.15
Activation_AsnASE_24HR_M1.fcs	93.9
Activation_AsnASE_24HR_M2.fcs	91.29
Activation_AsnASE_24HR_M3.fcs	90.82
Activation_AsnASE_24HR_M4.fcs	92.26
Activation_AsnASE_24HR_M5.fcs	92.77
Activation_AsnASE_36HR_M1.fcs	93.54
Activation_AsnASE_36HR_M2.fcs	90.54
Activation_AsnASE_36HR_M3.fcs	90.34
Activation_AsnASE_36HR_M4.fcs	92.46
Activation_AsnASE_36HR_M5.fcs	94.13
Activation_AsnASE_6HR_M1.fcs	91.13
Activation_AsnASE_6HR_M2.fcs	88.23
Activation_AsnASE_6HR_M3.fcs	88.21
Activation_AsnASE_6HR_M4.fcs	90.33
Activation_AsnASE_6HR_M5.fcs	91.84
Activation_AsnASE_start_M1.fcs	88.06
Activation_AsnASE_start_M2.fcs	83.4
Activation_AsnASE_start_M3.fcs	82.85
Activation_AsnASE_start_M4.fcs	85.47
Activation_AsnASE_start_M5.fcs	75
Activation_Asparagine_Deficient_RPMI_M1.fcs	81.05
Activation_Asparagine_Deficient_RPMI_M2.fcs	75.02
Activation_Asparagine_Deficient_RPMI_M3.fcs	78.33
Activation_Asparagine_Deficient_RPMI_M4.fcs	78.8
Activation_Asparagine_Deficient_RPMI_M5.fcs	73.33
Activation_RPMI_M1.fcs	96.23
Activation_RPMI_M2.fcs	93.9
Activation_RPMI_M3.fcs	94.77
Activation_RPMI_M4.fcs	95.4
Activation_RPMI_M5.fcs	96.32
