# Supplementary material for: Depletion of extracellular asparagine impairs self-reactive T cells and ameliorates autoimmunity in a murine model of multiple sclerosis
Source: eLife. 2026 Jul 8;14:RP107745. doi: 10.7554/eLife.107745 (PMC13345630; doi:10.7554/eLife.107745)
Supplement: Figure 2—source data 1. [file elife-107745-fig2-data1.xlsx]

## Sheet: 2B
Asns Normalized Counts
Time (hr)	TH1			pTH17			nTH17			Naive CD4+
0										4.84483	4.03913	4.99561
1	5.03751	5.21372	4.52757	4.68855	4.06327	4.85023	5.07461	3.45457	3.8141
6	7.24946	6.64834	7.16337	6.88926	6.74641	7.49564	6.88381	7.15532	7.47666
12	8.68518	8.41858	8.3663	8.82295	8.41247	8.26882	8.5371	8.22457	7.85386
20	9.11682	9.19628	9.12722	9.79796	9.29653	9.54969	9.37184	8.78642	8.64397
48	12.1519	12.5134	12.5938	12.0504	12.5162	12.6631	12.0584	12.1994	12.6923

## Sheet: 2C
Asrgl1 Normalized Counts
Time (hr)	TH1			pTH17			nTH17			Naive CD4+
0										9.17635	9.54242	9.57013
1	8.93268	8.85604	8.972	9.27488	9.24776	8.88736	8.98178	9.00967	8.95684
6	8.93497	8.79497	8.99716	9.06307	9.28816	8.85018	8.6645	9.03864	8.6818
12	9.04987	8.89753	8.79717	8.89944	8.71486	9.15799	8.68501	8.71433	8.92268
20	9.24579	9.42482	9.35286	9.36501	9.04437	8.97464	9.40863	9.21058	9.17405
48	10.0228	10.0948	9.96759	10.121	10.3707	10.0542	10.2892	10.2882	10.1022

## Sheet: 2D&E
qPCR Cq values
Condition	Gene Name	Cq
1_0HR	B2M	27.27		Gene	Name	Avg_Cp	SD_CP
1_0HR	B2M	27.5		B2M	1_0HR	27.3233	0.15695
1_0HR	B2M	27.2			3_24HR	22.5833	0.162891
3_24HR	B2M	22.47			4_48HR	20.9033	0.0907377
3_24HR	B2M	22.77
3_24HR	B2M	22.51
4_48HR	B2M	20.8
4_48HR	B2M	20.97		Asns	Name	Avg_Cp	SD_CP		delta_CP_Avg	delta_delta_CP_Avg	REL_Avg		delta_CP_SD	delta_delta_CP_SD	REL_SD
4_48HR	B2M	20.94			1_0HR	43.95	8.70234e-15		16.6267	0	1		0.15695	0.221961	0.0668169
1_0HR	Asrgl1	33.79			3_24HR	32.66	0.467761		10.0767	-6.55	93.7015		0.495311	0.519583	14.6559
1_0HR	Asrgl1	33.77			4_48HR	28.62	0.191572		7.71667	-8.91	481.036		0.211975	0.263755	38.1933
1_0HR	Asrgl1	34.38
3_24HR	Asrgl1	28.84
3_24HR	Asrgl1	29.03		Asrgl1	Name	Avg_Cp	SD_CP		delta_CP_Avg	delta_delta_CP_Avg	REL_Avg		delta_CP_SD	delta_delta_CP_SD	REL_SD
3_24HR	Asrgl1	28.87			1_0HR	33.98	0.346554		6.65667	0	1		0.380438	0.538021	0.16196
4_48HR	Asrgl1	27.57			3_24HR	28.9133	0.102144		6.33	-0.33	1.25411		0.192267	0.426263	0.160925
4_48HR	Asrgl1	27.46			4_48HR	27.4	0.20664		6.49667	-0.16	1.11729		0.225684	0.442342	0.148776
4_48HR	Asrgl1	27.17
1_0HR	Asns	43.95
1_0HR	Asns	43.95
1_0HR	Asns	43.95
3_24HR	Asns	32.12
3_24HR	Asns	32.92
3_24HR	Asns	32.94
4_48HR	Asns	28.4
4_48HR	Asns	28.71
4_48HR	Asns	28.75

## Sheet: 2G
ASNS/Actin Ratio
Naive	24 hour RPMI	24 hour Asn-deficient RPMI	48 hour RPMI	48 hour Asn-deficient RPMI
0.03	0.9	2.1	4.3	6.8
0.01	1.2	2.3	3.8	6.3
0.01	0.9	1.8	4.4	6.2

## Sheet: 2J
Division Indeces
RPMI	-Asn	0hr	6hr	12hr	24hr	36hr	48hr	60hr
2.49	1.05	0.68	0.69	0.85	1.4	1.76	1.95	2.04
2.21	1.22	0.58	0.7	0.73	1.17	1.3	1.83	2
2.51	1.15	0.67	0.76	0.86	1.39	1.74	2.02	2.1
2.44	1.17	0.64	0.69	0.89	1.51	1.89	2	2.23
2.62	1.23	0.67	0.87	0.93	1.51	2.11	2.13	2.29

## Sheet: 2K
CD25 MFI
Sample	Geometric Mean
Activation_AsnASE_12HR_M1.fcs	11430.6
Activation_AsnASE_12HR_M2.fcs	10474.1
Activation_AsnASE_12HR_M3.fcs	10487.7
Activation_AsnASE_12HR_M4.fcs	9455.49
Activation_AsnASE_12HR_M5.fcs	9684.77
Activation_AsnASE_24HR_M1.fcs	19795.2
Activation_AsnASE_24HR_M2.fcs	17480.2
Activation_AsnASE_24HR_M3.fcs	17140
Activation_AsnASE_24HR_M4.fcs	17278.4
Activation_AsnASE_24HR_M5.fcs	18303.5
Activation_AsnASE_36HR_M1.fcs	20962.8
Activation_AsnASE_36HR_M2.fcs	17366.8
Activation_AsnASE_36HR_M3.fcs	17964.2
Activation_AsnASE_36HR_M4.fcs	16055
Activation_AsnASE_36HR_M5.fcs	17695.2
Activation_AsnASE_6HR_M1.fcs	7431.17
Activation_AsnASE_6HR_M2.fcs	7136.91
Activation_AsnASE_6HR_M3.fcs	6310.32
Activation_AsnASE_6HR_M4.fcs	6145.03
Activation_AsnASE_6HR_M5.fcs	6410.05
Activation_AsnASE_start_M1.fcs	4660.63
Activation_AsnASE_start_M2.fcs	4393.48
Activation_AsnASE_start_M3.fcs	4321.7
Activation_AsnASE_start_M4.fcs	4403.01
Activation_AsnASE_start_M5.fcs	4074.7
Activation_Asparagine_Deficient_RPMI_M1.fcs	8075.37
Activation_Asparagine_Deficient_RPMI_M2.fcs	6745.07
Activation_Asparagine_Deficient_RPMI_M3.fcs	9506.24
Activation_Asparagine_Deficient_RPMI_M4.fcs	7464.27
Activation_Asparagine_Deficient_RPMI_M5.fcs	6167.47
Activation_RPMI_M1.fcs	25593.2
Activation_RPMI_M2.fcs	24814.5
Activation_RPMI_M3.fcs	24808.7
Activation_RPMI_M4.fcs	25427.2
Activation_RPMI_M5.fcs	21894.4

## Sheet: 2L
CD44 MFI
Sample	Geometric Mean
Activation_AsnASE_12HR_M1.fcs	7072.94
Activation_AsnASE_12HR_M2.fcs	5628.95
Activation_AsnASE_12HR_M3.fcs	5364.69
Activation_AsnASE_12HR_M4.fcs	5934.34
Activation_AsnASE_12HR_M5.fcs	6254.68
Activation_AsnASE_24HR_M1.fcs	10587.6
Activation_AsnASE_24HR_M2.fcs	6709.09
Activation_AsnASE_24HR_M3.fcs	7579.63
Activation_AsnASE_24HR_M4.fcs	7755.3
Activation_AsnASE_24HR_M5.fcs	8672.5
Activation_AsnASE_36HR_M1.fcs	10162.8
Activation_AsnASE_36HR_M2.fcs	6590.81
Activation_AsnASE_36HR_M3.fcs	7245.47
Activation_AsnASE_36HR_M4.fcs	6938.7
Activation_AsnASE_36HR_M5.fcs	7940.81
Activation_AsnASE_6HR_M1.fcs	5659.13
Activation_AsnASE_6HR_M2.fcs	4483.9
Activation_AsnASE_6HR_M3.fcs	4082.3
Activation_AsnASE_6HR_M4.fcs	4475.81
Activation_AsnASE_6HR_M5.fcs	4667.62
Activation_AsnASE_start_M1.fcs	3801.8
Activation_AsnASE_start_M2.fcs	3175.25
Activation_AsnASE_start_M3.fcs	2865.32
Activation_AsnASE_start_M4.fcs	3434.25
Activation_AsnASE_start_M5.fcs	3279.8
Activation_Asparagine_Deficient_RPMI_M1.fcs	4633.92
Activation_Asparagine_Deficient_RPMI_M2.fcs	3624.94
Activation_Asparagine_Deficient_RPMI_M3.fcs	4420.61
Activation_Asparagine_Deficient_RPMI_M4.fcs	3904.88
Activation_Asparagine_Deficient_RPMI_M5.fcs	3228.26
Activation_RPMI_M1.fcs	13672.9
Activation_RPMI_M2.fcs	9816.67
Activation_RPMI_M3.fcs	11192
Activation_RPMI_M4.fcs	11353.6
Activation_RPMI_M5.fcs	11764.9
