# Supplementary material for: Depletion of extracellular asparagine impairs self-reactive T cells and ameliorates autoimmunity in a murine model of multiple sclerosis
Source: eLife. 2026 Jul 8;14:RP107745. doi: 10.7554/eLife.107745 (PMC13345630; doi:10.7554/eLife.107745)
Supplement: Figure 3—figure supplement 1—source data 1. [file elife-107745-fig3-figsupp1-data1.xlsx]

## Sheet: 3A
Normalized Counts Slc1a5
	TH1			pTH17			nTH17			Naive CD4+
0										12.016	12.1244	12.1365
1	12.2449	12.2212	11.9658	12.0869	12.063	12.0426	11.8714	11.9641	12.0836
6	14.0926	14.1649	14.3794	14.0953	14.2426	14.3002	14.1981	14.3035	14.333
12	13.8415	13.8332	13.9435	13.728	13.7224	13.7172	13.7151	13.657	13.6153
20	13.7464	13.723	13.8256	13.4872	13.5589	13.6987	13.3007	13.258	13.4041
48	13.4032	13.4322	13.4154	13.0064	12.9867	13.0889	12.9224	13.0427	13.214

## Sheet: 3B
Normalized Counts for Slc38a2
	TH1			pTH17			nTH17			Naive CD4+
0										12.3663	12.3419	12.3553
1	14.2432	13.9598	14.1803	14.5436	14.3852	14.4026	14.519	14.37	14.3933
6	12.335	12.4848	12.3559	12.3898	12.3802	12.3684	12.5312	12.5116	12.3689
12	12.4562	12.3278	12.2924	12.3141	12.3553	12.2538	12.3454	12.4141	12.2394
20	12.4943	12.4498	12.4021	12.3762	12.3718	12.0733	12.4752	12.3674	12.2077
48	12.6344	12.4804	12.5756	12.4204	12.4401	12.4467	12.4822	12.6063	12.6471

## Sheet: 3C
Normalized Counts for Slc6a14
	TH1			pTH17			nTH17			Naive CD4+
0										5.04789	5.05105	5.18268
1	3.75133	4.54257	4.45269	5.09609	4.9119	3.97481	5.03056	4.70915	5.8162
6	4.3697	4.03817	4.66368	4.37328	4.42099	3.63801	4.73669	4.08962	4.3955
12	5.22443	4.24752	4.00036	4.24137	2.93314	4.69117	4.23762	3.78348	4.2199
20	2.93314	2.93314	3.44096	4.47711	2.93314	3.43964	2.93314	3.92425	3.81969
48	3.95046	2.93314	3.93868	2.93314	2.93314	3.44656	2.93314	2.93314	2.93314
