# Supplementary material for: Depletion of extracellular asparagine impairs self-reactive T cells and ameliorates autoimmunity in a murine model of multiple sclerosis
Source: eLife. 2026 Jul 8;14:RP107745. doi: 10.7554/eLife.107745 (PMC13345630; doi:10.7554/eLife.107745)
Supplement: Figure 3—source data 1. [file elife-107745-fig3-data1.xlsx]

## Sheet: 3C
OPP MFI
Sample	Geometric Mean
ClickIT OPP_AsnASE_M1.fcs	9545.34
ClickIT OPP_AsnASE_M2.fcs	11128.4
ClickIT OPP_AsnASE_M3.fcs	9797.59
ClickIT OPP_AsnASE_M4.fcs	10328.1
ClickIT OPP_AsnASE_M5.fcs	10338
ClickIT OPP_Asparagine_Deficient_RPMI_M1.fcs	10456.1
ClickIT OPP_Asparagine_Deficient_RPMI_M2.fcs	11308.2
ClickIT OPP_Asparagine_Deficient_RPMI_M3.fcs	11300.5
ClickIT OPP_Asparagine_Deficient_RPMI_M4.fcs	12684.1
ClickIT OPP_Asparagine_Deficient_RPMI_M5.fcs	11304.9
ClickIT OPP_Asparagine_Deficient_RPMI+L-Asparagine_M1.fcs	17038.4
ClickIT OPP_Asparagine_Deficient_RPMI+L-Asparagine_M2.fcs	17348.5
ClickIT OPP_Asparagine_Deficient_RPMI+L-Asparagine_M3.fcs	19342.3
ClickIT OPP_Asparagine_Deficient_RPMI+L-Asparagine_M4.fcs	19241.7
ClickIT OPP_Asparagine_Deficient_RPMI+L-Asparagine_M5.fcs	18592.7
ClickIT OPP_RPMI_M1.fcs	28897.7
ClickIT OPP_RPMI_M2.fcs	29152.2
ClickIT OPP_RPMI_M3.fcs	26843.9
ClickIT OPP_RPMI_M4.fcs	26993
ClickIT OPP_RPMI_M5.fcs	28617.8
ClickIT OPP_RPMI+Cyclohexamide_M1.fcs	8659.51
ClickIT OPP_RPMI+Cyclohexamide_M2.fcs	8910.7
ClickIT OPP_RPMI+Cyclohexamide_M3.fcs	8914.43
ClickIT OPP_RPMI+Cyclohexamide_M4.fcs	9548.51
ClickIT OPP_RPMI+Cyclohexamide_M5.fcs	9486.11
ClickIT OPP_Unstimulated_M1.fcs	11202.6
ClickIT OPP_Unstimulated_M2.fcs	10092.2
ClickIT OPP_Unstimulated_M3.fcs	10041.6
ClickIT OPP_Unstimulated_M4.fcs	10258.2
ClickIT OPP_Unstimulated_M5.fcs	9957.17

## Sheet: 3E
Fraction of unlabled and labeled asparagine
	M+0			M+2
0 hr	1.06652	0.941614	0.991861	-0.06653	0.058386	0.008139
24 hr	0.790645	0.515925	0.535444	0.209355	0.484075	0.464556
48 hr	0.320656	0.368718	0.293722	0.679344	0.631282	0.706278
