# Supplementary material for: Depletion of extracellular asparagine impairs self-reactive T cells and ameliorates autoimmunity in a murine model of multiple sclerosis
Source: eLife. 2026 Jul 8;14:RP107745. doi: 10.7554/eLife.107745 (PMC13345630; doi:10.7554/eLife.107745)
Supplement: Figure 4—figure supplement 1—source data 1. [file elife-107745-fig4-figsupp1-data1.xlsx]

## Sheet: 4A
Mitotracker Green MFI
Sample	Geometric Mean
MTG_AsnASE_0HR_M1.fcs	6210.64
MTG_AsnASE_0HR_M2.fcs	6697.16
MTG_AsnASE_0HR_M3.fcs	5798.91
MTG_AsnASE_0HR_M4.fcs	6117.04
MTG_AsnASE_0HR_M5.fcs	6513.4
MTG_AsnASE_6HR_M1.fcs	6995.24
MTG_AsnASE_6HR_M2.fcs	7346.49
MTG_AsnASE_6HR_M3.fcs	6623.33
MTG_AsnASE_6HR_M4.fcs	6744.06
MTG_AsnASE_6HR_M5.fcs	6823.69
MTG_AsnASE_12HR_M1.fcs	7642.35
MTG_AsnASE_12HR_M2.fcs	7992.34
MTG_AsnASE_12HR_M3.fcs	7551.54
MTG_AsnASE_12HR_M4.fcs	8015.58
MTG_AsnASE_12HR_M5.fcs	7735.19
MTG_AsnASE_24HR_M1.fcs	7880.27
MTG_AsnASE_24HR_M2.fcs	8526.58
MTG_AsnASE_24HR_M3.fcs	8438.5
MTG_AsnASE_24HR_M4.fcs	9065.22
MTG_AsnASE_24HR_M5.fcs	8825.48
MTG_AsnASE_36HR_M1.fcs	9585.35
MTG_AsnASE_36HR_M2.fcs	8793.74
MTG_AsnASE_36HR_M3.fcs	9428.41
MTG_AsnASE_36HR_M4.fcs	9151.37
MTG_AsnASE_36HR_M5.fcs	8735.74
MTG_Asparagine_Deficient_RPMI_M1.fcs	7589.15
MTG_Asparagine_Deficient_RPMI_M2.fcs	7968.25
MTG_Asparagine_Deficient_RPMI_M3.fcs	6947.28
MTG_Asparagine_Deficient_RPMI_M4.fcs	7156.85
MTG_Asparagine_Deficient_RPMI_M5.fcs	6674.48
MTG_RMPI_M1.fcs	9583.55
MTG_RMPI_M2.fcs	9589.27
MTG_RMPI_M3.fcs	8990.75
MTG_RMPI_M4.fcs	8589.15
MTG_RMPI_M5.fcs	8246.72

## Sheet: 4B
TMRM MFI
Sample	Geometric Mean
TMRM_AsnASE_0HR_M1.fcs	1780.15
TMRM_AsnASE_0HR_M2.fcs	1833.48
TMRM_AsnASE_0HR_M3.fcs	1708.29
TMRM_AsnASE_0HR_M4.fcs	1209.13
TMRM_AsnASE_0HR_M5.fcs	1354.52
TMRM_AsnASE_6HR_M1.fcs	2002.2
TMRM_AsnASE_6HR_M2.fcs	1843.51
TMRM_AsnASE_6HR_M3.fcs	1869.46
TMRM_AsnASE_6HR_M4.fcs	1597.41
TMRM_AsnASE_6HR_M5.fcs	1542.72
TMRM_AsnASE_12HR_M1.fcs	2048.35
TMRM_AsnASE_12HR_M2.fcs	2291.99
TMRM_AsnASE_12HR_M3.fcs	2097.59
TMRM_AsnASE_12HR_M4.fcs	1949.97
TMRM_AsnASE_12HR_M5.fcs	1863.31
TMRM_AsnASE_24HR_M1.fcs	3218.83
TMRM_AsnASE_24HR_M2.fcs	2816.08
TMRM_AsnASE_24HR_M3.fcs	2987.45
TMRM_AsnASE_24HR_M4.fcs	2622.59
TMRM_AsnASE_24HR_M5.fcs	3275.69
TMRM_AsnASE_36HR_M1.fcs	3197.79
TMRM_AsnASE_36HR_M2.fcs	2992.84
TMRM_AsnASE_36HR_M3.fcs	3232.57
TMRM_AsnASE_36HR_M4.fcs	3015.88
TMRM_AsnASE_36HR_M5.fcs	3254.2
TMRM_Asparagine_Deficient_RPMI_M1.fcs	1990.58
TMRM_Asparagine_Deficient_RPMI_M2.fcs	2138.77
TMRM_Asparagine_Deficient_RPMI_M3.fcs	2254.86
TMRM_Asparagine_Deficient_RPMI_M4.fcs	1738.78
TMRM_Asparagine_Deficient_RPMI_M5.fcs	2061.92
TMRM_RMPI_M1.fcs	3665.82
TMRM_RMPI_M2.fcs	3518.2
TMRM_RMPI_M3.fcs	3455.93
TMRM_RMPI_M4.fcs	4087.48
TMRM_RMPI_M5.fcs	4041.55
