# Supplementary material for: Depletion of extracellular asparagine impairs self-reactive T cells and ameliorates autoimmunity in a murine model of multiple sclerosis
Source: eLife. 2026 Jul 8;14:RP107745. doi: 10.7554/eLife.107745 (PMC13345630; doi:10.7554/eLife.107745)
Supplement: Figure 4—source data 1. [file elife-107745-fig4-data1.xlsx]

## Sheet: 4C
Frequency of cells part of TMRM/MTG population
Sample	Frequency
MTG_TMRM_AsnASE_0HR_M1.fcs	19.49
MTG_TMRM_AsnASE_0HR_M2.fcs	17.76
MTG_TMRM_AsnASE_0HR_M3.fcs	23.32
MTG_TMRM_AsnASE_0HR_M4.fcs	17.06
MTG_TMRM_AsnASE_0HR_M5.fcs	24.14
MTG_TMRM_AsnASE_6HR_M1.fcs	4.04
MTG_TMRM_AsnASE_6HR_M2.fcs	5.31
MTG_TMRM_AsnASE_6HR_M3.fcs	3.53
MTG_TMRM_AsnASE_6HR_M4.fcs	3.9
MTG_TMRM_AsnASE_6HR_M5.fcs	4.94
MTG_TMRM_AsnASE_12HR_M1.fcs	4.17
MTG_TMRM_AsnASE_12HR_M2.fcs	4.33
MTG_TMRM_AsnASE_12HR_M3.fcs	3
MTG_TMRM_AsnASE_12HR_M4.fcs	2.57
MTG_TMRM_AsnASE_12HR_M5.fcs	4.06
MTG_TMRM_AsnASE_24HR_M1.fcs	3.31
MTG_TMRM_AsnASE_24HR_M2.fcs	3.37
MTG_TMRM_AsnASE_24HR_M3.fcs	3.18
MTG_TMRM_AsnASE_24HR_M4.fcs	3.27
MTG_TMRM_AsnASE_24HR_M5.fcs	3.41
MTG_TMRM_AsnASE_36HR_M1.fcs	3.93
MTG_TMRM_AsnASE_36HR_M2.fcs	3.78
MTG_TMRM_AsnASE_36HR_M3.fcs	4.48
MTG_TMRM_AsnASE_36HR_M4.fcs	3.82
MTG_TMRM_AsnASE_36HR_M5.fcs	4.94
MTG_TMRM_Asparagine_Deficient_RPMI_M1.fcs	18.11
MTG_TMRM_Asparagine_Deficient_RPMI_M2.fcs	18.54
MTG_TMRM_Asparagine_Deficient_RPMI_M3.fcs	16.57
MTG_TMRM_Asparagine_Deficient_RPMI_M4.fcs	17.14
MTG_TMRM_Asparagine_Deficient_RPMI_M5.fcs	14.88
MTG_TMRM_RPMI_M1.fcs	2.81
MTG_TMRM_RPMI_M2.fcs	3.26
MTG_TMRM_RPMI_M3.fcs	1.39
MTG_TMRM_RPMI_M4.fcs	2.18
MTG_TMRM_RPMI_M5.fcs	1.61

## Sheet: 4E
Time (minutes)	RPMI						Asparagine-Deficient RPMI						AsnASE 0HR						AsnASE 6HR						AsnASE 12HR						AsnASE 24HR						AsnASE 36HR
1.5363	105.392	102.186	97.679	113.59	114.562	124.312	7.94608	11.3131	11.6368	11.4331	10.0846	9.08141	30.4793	29.3639	30.7943	32.5206	27.5963	26.1787	37.7344	38.4434	38.7006	39.0816	36.4477	30.6881	38.2898	47.4613	47.1886	44.7785	45.7974	38.1892	75.7365	77.9897	75.35	79.4683	84.1442	87.7931	101.853	107.036	108.649	124.815	105.74	100.4
8.37915	112.564	107.851	105.233	124.057	121.153	129.269	7.99179	10.3363	10.3972	10.8256	9.57405	9.24252	29.1754	29.539	30.3872	31.8587	27.7768	25.6612	37.6393	38.5317	37.9503	38.1323	37.0921	31.237	37.7188	47.9732	48.0038	45.1104	45.6975	37.9661	77.1796	81.1965	78.0858	82.395	87.9366	90.069	102.959	109.994	114.366	133.101	113.215	107.376
15.2232	109.625	104.601	102.454	121.412	121.332	128.963	6.55148	9.21301	9.45551	9.81437	8.33567	8.67868	28.2602	27.821	29.9733	30.6545	27.5228	25.0071	36.7714	36.7595	37.6082	37.3049	35.2319	29.4975	35.8861	46.6474	46.5799	43.9691	44.8133	36.9624	76.3527	81.1474	78.1862	81.177	86.1188	89.6812	100.194	108.682	112.736	131.838	113.342	105.358
22.1802	50.4071	54.0431	50.9789	55.97	51.0516	54.9984	3.04444	4.18816	3.97505	3.86853	4.12403	3.35385	9.37069	9.0505	11.0159	10.8584	10.0242	9.55762	13.0283	13.1775	12.83	14.4217	13.5105	10.2066	12.8707	17.2737	17.6627	16.5938	16.2478	13.5155	28.0658	30.1779	30.5681	30.2601	31.3055	30.6203	45.4386	47.9557	50.7991	50.833	46.7781	40.6253
29.0261	49.2304	54.3716	50.7687	54.849	52.4228	54.4579	3.24978	4.83978	4.71347	4.22498	4.56545	4.04183	10.4324	10.5403	12.3654	12.9024	10.8764	9.07285	13.9459	14.322	14.417	15.7046	14.3824	11.1269	12.4366	18.1988	18.9297	17.6334	15.3203	12.8657	29.7422	31.2634	32.03	30.0979	32.0545	32.0782	45.8638	48.6354	50.022	52.839	47.7174	41.0947
35.8783	51.4628	56.0328	52.6097	57.0637	53.4494	57.9639	4.23052	5.4835	5.2686	5.09615	4.29361	3.60564	12.1888	13.1612	14.3375	13.7715	12.3362	10.1733	15.7717	15.9181	17.2675	18.4202	16.1117	12.8649	15.2932	20.2965	20.855	19.2514	17.7555	14.1135	31.5668	34.4911	34.4253	32.9833	34.8413	34.9762	46.5757	50.3077	51.6874	55.4237	49.9005	42.8646
42.8297	223.421	205.098	205.194	244.907	227.405	257.604	5.77436	7.11773	6.05144	6.50472	5.65687	5.18413	17.1158	15.5319	20.0513	18.2104	16.2633	12.8752	24.6341	23.9187	22.4722	27.252	19.1104	16.4847	24.7599	30.1899	39.6576	30.203	30.6229	21.9499	89.8299	103.727	81.2511	95.8643	82.7679	91.748	155.376	174.042	188.358	235.396	220.06	172.806
49.6863	232.945	217.104	217.38	260.911	230.305	261.202	5.17657	6.32354	6.07629	6.36723	5.77618	5.14323	17.0607	15.4283	19.1815	17.9914	15.1338	12.611	23.4368	22.5771	20.2457	24.3167	18.3889	14.4729	25.5854	30.0609	36.6554	27.7792	29.0136	19.6632	83.7088	94.9284	76.2344	86.8205	72.7327	85.8801	157.332	176.595	191.382	247.303	221.118	169.613
56.5399	235.954	217.457	218.272	263.972	231.07	262.827	5.82409	7.14992	6.29614	6.19987	6.09863	5.10969	16.5613	17.0928	20.6918	18.0859	15.0354	12.6697	25.7668	24.054	23.6822	25.5211	19.1621	15.6205	26.0959	31.89	36.7544	28.8384	29.1635	19.3705	86.1282	97.1849	78.5776	87.1053	74.4281	86.2859	159.36	178.092	193.556	252.198	223.941	169.631
63.4851	18.5333	20.2977	18.7249	19.8383	19.0322	19.2313	1.32025	1.79926	1.7328	1.7718	0.613047	1.53699	4.3811	6.27349	5.59904	5.70103	5.01806	4.39308	6.08181	6.78787	4.88139	7.18607	6.53338	4.94127	6.53563	8.47231	10.2385	8.28382	7.8519	6.49245	15.0201	15.6221	15.5171	15.1451	16.706	15.1465	20.8557	18.5624	18.8669	19.1448	17.0995	16.8832
70.3373	20.8066	21.4636	20.5791	22.7713	22.2387	21.7315	2.08681	2.8854	2.4032	2.70944	2.14604	1.08801	3.94328	6.70948	5.29775	5.18871	3.31642	3.17297	6.1353	6.59833	4.3493	6.84268	5.63123	4.30776	5.64627	8.13571	9.33424	7.70372	7.6301	5.73031	13.4882	14.7916	14.3726	14.346	15.0883	14.0716	20.1337	18.677	19.1409	21.2254	19.2909	18.2647
77.1957	20.4934	21.1615	20.3644	23.4522	21.1329	22.1258	1.31876	1.87694	1.78429	2.37361	2.21371	1.82129	4.50058	6.37703	5.4612	4.85051	3.38799	2.77614	5.32955	5.97908	5.88349	6.49362	5.14448	3.65036	5.99681	8.47739	10.1871	7.54488	7.62927	5.24691	13.0132	13.5714	13.9971	13.8423	14.4344	13.3031	19.8554	18.8996	19.2632	20.0878	18.9688	16.7218

## Sheet: 4F
Basal Respiration OCR (pmol/min)
RPMI	Asparagine-Deficient RPMI	RPMI + 10U/L Peg-AsnASE	RPMI + 10U/L Peg-AsnASE 6HR	RPMI + 10U/L Peg-AsnASE 12HR	RPMI + 10U/L Peg-AsnASE 24HR	RPMI + 10U/L Peg-AsnASE 36HR																																					RPMI + 10U/L Peg-AsnASE 36HR
91.09	5.23	23.76	31.44	30.24	63.34	79.34
84.3	7.41	21.44	30.78	38.51	67.58	90.12
83.73	7.72	24.51	31.72	37.25	64.19	93.87
101.57	8.04	25.8	30.81	36.27	67.33	112.69
102.3	7.72	24.13	30.09	37.18	71.68	96.24
109.73	7.14	22.23	25.85	31.23	76.38	88.47

## Sheet: 4G
ATP Production OCR (pmol/min)
RPMI	Asparagine-Deficient RPMI	RPMI + 10U/L Peg-AsnASE	RPMI + 10U/L Peg-AsnASE 6HR	RPMI + 10U/L Peg-AsnASE 12HR	RPMI + 10U/L Peg-AsnASE 24HR	RPMI + 10U/L Peg-AsnASE 36HR
60.39	3.51	18.89	23.74	23.02	48.29	54.76
50.23	5.02	18.77	23.58	29.37	50.97	60.73
51.69	5.48	18.96	24.78	28.92	47.62	61.94
66.56	5.95	19.8	22.88	27.38	50.92	81
68.91	4.21	17.5	21.72	28.57	54.81	66.56
74.51	5.32	15.45	19.29	23.45	59.06	64.73

## Sheet: 4H
Time (minutes)	RPMI						Asparagine-Deficient RPMI						AsnASE 0HR						AsnASE 6HR						AsnASE 12HR						AsnASE 24HR						AsnASE 36HR
1.54593	25.489	26.9557	24.3528	22.5795	25.6476	16.6592	2.27645	4.0826	3.81392	3.69878	3.93675	2.68188	4.27275	4.00655	4.7654	2.36587	5.34192	3.66321	3.30796	3.96826	5.07636	3.79395	4.20564	3.49043	9.08115	8.33456	8.17042	7.84235	8.46195	8.00845	11.6277	13.0463	13.048	11.7705	11.2237	11.5607	22.9497	21.4487	22.8942	20.9228	20.5078	14.6165
8.39893	24.1321	26.1745	23.7919	21.8838	24.899	16.7175	2.48194	4.17238	3.74115	3.5385	3.69134	3.24481	4.00331	3.75984	4.42784	2.28373	4.75544	3.53534	3.38325	4.16973	4.32492	3.81473	4.14248	3.57781	8.56688	8.35237	7.74632	7.36873	8.18808	7.49467	11.2932	12.4351	12.4017	11.5383	10.6611	11.1477	22.6842	21.4883	22.3451	21.0761	20.1283	14.2506
15.2462	24.2477	26.387	24.0739	21.9611	24.7417	16.3259	3.05687	3.84834	3.84423	3.8707	3.81892	3.25376	4.32546	4.03133	4.36763	2.27937	4.66353	3.60041	3.34102	4.05369	4.2624	3.89322	4.05295	3.56314	8.57131	8.51414	7.96962	7.55022	8.21708	7.58724	11.2345	12.7591	12.591	11.6577	11.0586	11.1586	22.4333	21.2634	22.0412	21.2531	20.1299	13.8417
22.2047	89.4776	92.8357	88.5509	75.7605	83.7693	56.1113	13.5702	15.6055	14.9649	15.5662	14.6262	13.1867	17.4899	16.2184	17.1797	15.6688	17.2704	13.8972	13.568	13.7911	13.7482	13.2585	13.6728	11.9607	31.458	30.6152	31.236	28.5479	30.4693	27.1707	39.8414	42.6262	42.5963	40.2526	36.6043	38.64	81.9201	83.3117	84.4947	84.2973	82.1078	53.7616
29.0561	109.122	111.42	104.992	93.2709	102.773	70.9593	16.6727	18.3756	17.8749	18.4025	16.9174	15.5439	20.8749	18.8183	20.1881	18.842	20.8154	16.5216	16.838	16.8045	16.63	16.1522	17.0782	14.8488	38.687	36.7107	37.4506	34.2625	36.7449	32.9687	52.5229	55.7065	56.4164	52.7362	48.3321	50.2725	99.3999	98.4742	100.925	99.7746	96.7249	66.0681
35.9142	113.461	115.78	108.569	97.7661	107.352	74.0348	17.739	19.6992	19.0261	19.3022	18.0708	16.1326	21.9533	19.4721	20.9618	19.6887	21.7729	17.2709	17.5422	17.8126	17.5867	16.7828	17.9196	15.3964	40.177	37.9159	38.9891	35.5769	38.3196	34.5726	55.2828	58.3801	59.1519	55.1527	50.694	52.2997	102.501	101.447	104.054	102.544	99.3788	68.6785
42.8693	183.912	173.308	164.638	146.19	161.674	102.33	22.238	24.1079	23.5683	24.4033	22.7911	20.1796	27.1356	25.0333	26.7911	23.0997	27.6759	21.8912	23.4535	23.7458	22.9927	22.495	23.4577	20.3055	55.2946	53.2251	54.5637	49.6514	53.3578	47.555	77.7798	82.6725	84.3881	78.9082	71.8186	73.6037	156.122	141.552	143.381	144.449	140.752	95.0124
49.7237	177.313	167.217	159.239	142.43	154.448	103.702	22.7022	24.1739	23.6124	24.3249	22.482	19.9487	27.3106	24.7501	26.7939	23.3636	27.0919	21.8664	23.8752	24.0831	23.1602	22.3095	23.0961	20.4914	55.5056	52.9334	53.5011	48.6959	52.2483	47.2347	77.6863	82.5546	83.2051	77.9838	71.0324	73.134	149.239	136.73	139.536	140.063	135.5	93.4069
56.5841	172.364	163.036	154.962	139.369	150.69	102.073	22.3421	23.732	23.4222	23.9558	22.3089	19.9607	27.1076	24.8334	26.4947	22.5979	27.2129	21.7018	23.4408	23.6692	22.9442	22.1943	23.1538	20.1258	54.2825	51.8893	52.6538	48.1414	51.5501	46.6484	76.4944	81.0919	82.1686	76.8553	70.1232	71.9313	144.756	132.618	136.499	136.31	132.492	91.6116
63.5466	31.0417	33.8666	28.3938	26.9094	27.1967	17.4342	2.66557	3.6918	4.02982	4.22687	3.5911	3.41675	4.10036	3.66193	3.50729	2.5488	4.12003	3.29466	3.28466	3.61874	3.59746	3.59734	3.51077	3.14904	7.86811	7.73515	7.13213	6.70263	7.45805	6.72591	11.3755	9.4508	9.28984	9.65082	9.76833	10.8035	29.7668	28.505	27.8434	26.0448	27.1368	19.1026
70.4151	27.7856	27.2199	24.0554	22.0395	22.4405	14.113	2.65346	3.81082	4.14512	3.9916	3.74447	3.04619	4.14534	3.60543	3.936	2.34424	4.183	3.18479	3.3163	3.60462	3.61111	3.61823	3.63208	3.31404	7.56005	7.41037	6.90904	6.44094	7.24963	6.48096	10.1913	9.35139	8.85625	8.67929	8.52292	9.70355	21.949	21.052	21.4139	20.915	20.5062	13.9848
77.2768	26.3563	26.527	23.5518	21.6254	21.8631	13.7021	2.28728	3.69652	4.12328	3.85631	3.77928	2.90974	3.80335	3.71719	4.17102	2.36529	4.04036	3.4792	3.2995	3.52052	3.78411	3.49398	3.91562	3.15587	7.5583	7.04991	7.06184	6.61391	7.08615	6.09427	9.41083	9.13967	8.8748	8.60865	8.47771	9.00949	20.2085	18.989	20.1933	19.5975	19.3909	12.6044

## Sheet: 4I
Glycolysis ECAR (mpH/min)
RPMI	Asparagine-Deficient RPMI	RPMI + 10U/L Peg-AsnASE	RPMI + 10U/L Peg-AsnASE 6HR	RPMI + 10U/L Peg-AsnASE 12HR	RPMI + 10U/L Peg-AsnASE 24HR	RPMI + 10U/L Peg-AsnASE 36HR
89.21	14.68	17.63	14.2	31.61	44.05	80.07
89.39	15.85	15.44	13.76	29.4	45.62	80.18
84.49	15.18	16.59	13.32	31.02	46.56	82.01
75.81	15.43	17.41	12.89	28.03	43.49	81.29
82.61	14.25	17.11	13.87	30.1	39.64	79.25
57.71	12.88	13.67	11.83	26.99	41.14	54.84

## Sheet: 4K
Time (minutes)	DMEM						Asparagine						Alanine						Aspartate						Glutatmate						Proline
1.5537	67.3675	71.0201	78.0087	76.2214	73.2135	68.6966	197.794	204.87	217.088	221.695	226.354	211.334	77.5706	79.8174	81.5723	84.0188	80.6025	77.1772	92.0804	88.9054	90.9091	96.5818	83.49	82.7597	75.1521	70.6137	78.8	77.5599	76.385	72.7768	98.3341	101.127	102	104.096	97.7626	94.7758
8.42957	66.622	70.9013	77.1527	75.0763	72.7248	68.0568	196.607	203.261	217.839	221.464	225.937	209.884	75.9065	76.5387	81.1633	82.8796	78.9898	75.2393	91.7629	89.2011	91.2267	96.6557	79.4073	80.8765	73.0975	73.1004	78.1875	77.354	74.8086	70.9901	98.0903	100.198	101.681	103.009	97.019	92.3114
15.3065	65.3269	70.1704	75.52	73.863	71.4101	66.5583	192.57	198.903	212.927	215.963	220.114	203.15	75.7547	76.8149	79.6889	80.8912	78.0526	73.6525	90.9497	87.7888	90.2869	95.564	76.1976	78.5604	72.1075	71.9071	76.4496	75.863	73.3055	68.721	96.6753	98.3866	99.9767	102.033	95.8204	90.4145
22.2858	26.6251	69.3984	30.702	31.0551	71.344	66.4875	67.4189	70.1884	211.769	215.508	218.14	201.706	28.1533	28.9618	31.4552	32.9255	31.3024	29.6988	89.8508	34.1559	35.8425	36.7826	32.6553	29.6606	27.4062	28.6843	31.082	74.8196	30.4283	25.6421	38.3857	37.9596	38.6057	40.5055	37.8624	89.9843
29.1613	28.8216	67.7534	32.9963	31.5583	69.9104	64.4738	73.9615	77.2434	210.199	214.609	216.59	200.109	31.6263	32.4794	33.4812	34.4081	32.2967	30.8591	88.5465	38.8713	37.8057	38.9582	32.7119	31.5987	29.9462	31.168	32.8208	73.4198	30.0615	27.1773	40.3454	41.2451	42.3256	44.4859	39.8665	87.3097
36.046	30.0984	67.2409	34.2852	33.4365	70.0649	64.1429	79.3265	83.1856	212.015	215.42	217.407	201.122	34.5483	36.1429	35.5148	37.7057	34.0612	32.9899	89.6434	41.3053	40.8875	41.7964	35.0991	33.845	32.6442	32.9858	34.9309	73.8905	32.7903	28.6603	42.7982	44.6808	44.7723	46.8742	42.9534	87.9776
43.0145	58.1645	109.292	66.3471	61.892	132.595	93.9642	363.243	398.754	526.559	520.911	534.517	425.322	65.2817	96.6541	77.7652	76.1192	66.9297	65.4483	140.516	118.041	92.9055	97.3264	66.793	70.4655	61.134	84.059	68.4403	122.164	62.8206	51.4993	103.363	112.143	116.78	107.999	122.238	141.442
49.8911	55.4323	104.499	60.8595	57.6802	118.558	85.4645	392.921	438.842	500.28	515.268	529.919	416.709	62.5996	94.9413	70.8644	72.2679	63.6627	56.7141	137.091	111.084	85.681	89.1493	59.6288	62.5613	60.6724	80.1394	61.1719	109.5	56.3948	44.8182	102.136	102.86	107.729	98.3775	108.356	132.648
56.7721	57.9078	108.317	63.5802	62.9215	121.165	88.2221	410.48	468.423	506.631	522.492	545.617	431.4	63.6082	95.9497	70.0156	72.9091	68.1802	58.5377	140.05	108.898	86.4898	90.737	61.0474	62.0105	62.9398	81.2602	62.6464	110.934	57.5762	47.0297	107.22	106.605	108.119	100.834	110.092	136.93
63.7332	18.6474	21.689	22.6097	23.4552	20.9609	19.729	30.3243	32.0613	42.709	41.8729	44.6965	42.6533	19.4204	20.4755	22.3957	22.343	20.2588	19.6815	25.9849	20.8113	22.9255	23.6151	19.2529	19.9294	18.7631	20.5542	21.0549	22.719	20.3441	18.0316	24.9624	25.3216	27.6511	30.9012	26.0243	24.693
70.6213	16.8295	19.7732	18.9516	18.6168	20.2491	17.2775	32.0056	34.5611	43.4936	45.0287	44.8805	40.2448	18.5488	20.118	19.442	19.4836	17.7197	17.2239	24.4799	20.2639	22.3673	22.1461	17.6799	18.1182	16.8462	18.2179	18.6269	21.1692	18.562	16.609	23.2986	23.6708	24.5183	27.9329	23.3108	23.2724
77.4994	15.2507	18.8395	17.6799	17.4981	18.8766	15.913	32.5049	35.1798	40.8915	42.5831	42.5186	38.2605	17.5386	17.9992	17.4969	18.3695	16.3293	16.1274	22.5295	19.7282	21.6763	20.748	17.5594	16.4241	16.0089	17.0339	18.1374	18.3494	17.2855	15.3401	21.3873	22.3122	23.3974	25.8969	21.8482	22.1511

## Sheet: 4L
Basal Respiration OCR (pmol/min)
DMEM	Asn	Ala	Asp	Glu	Pro
47.7492	143.931	37.2569	48.7933	56.7585	67.8741
50.0657	149.918	42.1082	48.9139	52.712	69.0188
45.3436	135.383	41.8644	44.3556	49.291	59.7127
44.1463	139.476	41.0104	47.8203	49.8879	59.5253
49.448	138.556	39.3847	44.336	50.1062	57.0811
45.0209	130.884	42.4728	41.6683	43.3963	65.2661

## Sheet: 4M
Maximal Respiration OCR (pmol/min)
DMEM	Asn	Ala	Asp	Glu	Pro
42.91	377.98	47.74	117.99	45.13	81.98
90.45	433.24	78.65	98.31	67.03	89.83
48.67	465.74	60.27	71.23	50.3	93.38
44.39	479.91	57.75	76.58	103.81	82.1
113.72	503.1	50.6	49.23	45.54	100.39
78.05	393.14	49.32	54.04	36.16	119.29
