# Supplementary material for: Depletion of extracellular asparagine impairs self-reactive T cells and ameliorates autoimmunity in a murine model of multiple sclerosis
Source: eLife. 2026 Jul 8;14:RP107745. doi: 10.7554/eLife.107745 (PMC13345630; doi:10.7554/eLife.107745)
Supplement: Figure 5—figure supplement 1—source data 1. [file elife-107745-fig5-figsupp1-data1.xlsx]

## Sheet: 5A
Frequency Tbet+ Cells			MFI Tbet Foldchange
RPMI	-Asn RPMI		RPMI	-Asn RPMI
97.57	89.47		55.4408	43.5003
97.63	89.65		43.6566	43.1757
97.45	84.05		49.9701	29.2667
99.06	87.61		52.5899	44.4572
99.34	89.61		62.391	52.6671
99.18	88.52		52.5838	49.1847
99.1	89.94		51.1334	48.5913
98.91	87.61		48.7982	43.2424

## Sheet: 5B
Frequency Roryt+ Cells			Roryt+ MFI FC
RPMI	-Asn RPMI		RPMI	-Asn RPMI
98.94	89.65		24.0081	11.8773
98.14	86.7		24.2346	8.61619
98.7	87.59		22.7279	11.7726
98.87	87.47		22.0208	10.531
98.43	87.57		20.6737	13.3198
95.39	88.43		31.6485	20.0311
94.55	87.33		33.2513	20.3321
94.54	87.56		30.917	19.4435

## Sheet: 5C
Frequency Roryt+ Cells			Roryt+ MFI FC
RPMI	-Asn RPMI		RPMI	-Asn RPMI
97.73	87.56		31.7672	19.5683
97.7	86.59		39.0109	23.275
97.35	88.14		38.268	20.285
97.42	88.74		13.2391	8.95079
96.29	88.08		14.6527	6.8416
95.45	90.49		13.3058	9.42164
96.62	92.75		12.9152	9.10147
96.47	89.31		11.2372	9.93829

## Sheet: 5D
Frequency GATA3+ Cells			GATA3+ MFI FC
RPMI	-Asn RPMI		RPMI	-Asn RPMI
82.3	53.1		5.02315	3.09259
70.7	70.2		4.17593	4.07176
75.3	59.5		4.28935	3.52083
98.22	85.21		8.03724	2.54716
98.16	86.86		7.7153	2.54969
98.34	86.52		7.40681	2.59855
98.32	87.39		7.29768	2.67942
98.44	85.66		7.05792	2.45618

## Sheet: 5E
Frequency FOXP3+ Cells			FOXP3+ MFI FC
RPMI	-Asn RPMI		RPMI	-Asn RPMI
68.4	54.18		9.5765	7.25453
68.11	44.9		10.1074	5.53718
68.39	61.31		9.54237	8.77438
64.7	60.16		8.57319	8.42676
66.98	59.91		9.22544	8.3297
32.26	11.1		1.29661	0.732576
43.69	16.67		1.7025	0.852078
67.03	14.51		3.18754	0.783982
