# Supplementary material for: Depletion of extracellular asparagine impairs self-reactive T cells and ameliorates autoimmunity in a murine model of multiple sclerosis
Source: eLife. 2026 Jul 8;14:RP107745. doi: 10.7554/eLife.107745 (PMC13345630; doi:10.7554/eLife.107745)
Supplement: Figure 5—source data 1. [file elife-107745-fig5-data1.xlsx]

## Sheet: 5C
Frequency of IFNgamma+ Cells
RPMI	Asparagine-Deficient RPMI	RPMI + 10U/L Peg-AsnASE	RPMI + 10U/L Peg-AsnASE 12HR	RPMI + 10U/L Peg-AsnASE 24HR	RPMI + 10U/L Peg-AsnASE 36HR	RPMI + 10U/L Peg-AsnASE 48HR
25.46	17.57	6.16	6.01	16.56	18.38	18.78
30.44	16.05	7.23	10.79	18.83	20.6	23.27
31.52	18.65	8.07	10.13	21.3	24.11	28.42

## Sheet: 5D
IFNgamma MFI
RPMI	Asparagine-Deficient RPMI	RPMI + 10U/L Peg-AsnASE	RPMI + 10U/L Peg-AsnASE 12HR	RPMI + 10U/L Peg-AsnASE 24HR	RPMI + 10U/L Peg-AsnASE 36HR	RPMI + 10U/L Peg-AsnASE 48HR
525.85	238.33	269.29	250.71	300.44	358.08	458.66
479.36	230.08	341.04	265.89	291.85	385.41	466.88
423.44	222.88	280.87	170.61	222.91	238.04	410.99

## Sheet: 5F
Frequency of IL17A+ Cells npTH17
RPMI	Asparagine-Deficient RPMI	RPMI + 10U/L Peg-AsnASE	RPMI + 10U/L Peg-AsnASE 12HR	RPMI + 10U/L Peg-AsnASE 24HR	RPMI + 10U/L Peg-AsnASE 36HR	RPMI + 10U/L Peg-AsnASE 48HR
38.34	19.87	14.7	17.36	25.44	29.61	32.6
37.45	27.13	22.53	20.94	29.82	36.44	35.89
40.86	19.54	16.4	20.2	31.65	37.89	38.49

## Sheet: 5G
Il17A MFI npTH17
RPMI	Asparagine-Deficient RPMI	RPMI + 10U/L Peg-AsnASE	RPMI + 10U/L Peg-AsnASE 12HR	RPMI + 10U/L Peg-AsnASE 24HR	RPMI + 10U/L Peg-AsnASE 36HR	RPMI + 10U/L Peg-AsnASE 48HR
938.72	401.38	257.05	354.43	528.74	679.72	806.16
934.26	631.86	411.13	448.62	694.45	924.77	951.38
1080.89	439.49	316.48	458.73	773.29	1000.45	1053.01

## Sheet: 5I
Frequency of IL17A+ Cells pTH17
RPMI	Asparagine-Deficient RPMI	RPMI + 10U/L Peg-AsnASE	RPMI + 10U/L Peg-AsnASE 12HR	RPMI + 10U/L Peg-AsnASE 24HR	RPMI + 10U/L Peg-AsnASE 36HR	RPMI + 10U/L Peg-AsnASE 48HR
13.3	3.39	3.24	4.68	4.13	7.64	10.4
12.11	3.38	3.48	3.27	4.52	6.72	7.66
12.36	2.94	3.13	3.42	3.78	8.15	7.3

## Sheet: 5J
Il17A MFI pTH17
RPMI	Asparagine-Deficient RPMI	RPMI + 10U/L Peg-AsnASE	RPMI + 10U/L Peg-AsnASE 12HR	RPMI + 10U/L Peg-AsnASE 24HR	RPMI + 10U/L Peg-AsnASE 36HR	RPMI + 10U/L Peg-AsnASE 48HR
2117.65	752.13	823.21	949.86	862.94	1400.89	1592.11
1889.59	794.63	911.51	828.33	931.98	1216.51	1306.29
1830.01	744.55	886.44	869.41	859.53	1412.8	1232.95
