# Supplementary material for: Depletion of extracellular asparagine impairs self-reactive T cells and ameliorates autoimmunity in a murine model of multiple sclerosis
Source: eLife. 2026 Jul 8;14:RP107745. doi: 10.7554/eLife.107745 (PMC13345630; doi:10.7554/eLife.107745)
Supplement: Figure 6—figure supplement 1—source data 1. [file elife-107745-fig6-figsupp1-data1.xlsx]

## Sheet: 6A
	pTH17 Control RPMI																		pTH17 Asparagine-deficient RPMI
0	0	0	0	0	0	0	0	0	0	0	0	0	0	0	0	0			0	0	0	0	0	0	0	0	0	0	0	0
1
2
3
4
5
6
7
8
9
10
11	0	0.25	1	0	0	0.5	0.25	0	0	0.25	0	0	0	0	0.25	0			0	0	0	0	0.25	0	0	0	0	0	0	0
12	1	0.5	1.25	0	0	1	0.5	0	0.25	0.5	0	0	0	0	0.25	0			0	0	0	0	0.25	0	0	0	0	0	0	0
13	1.25	1	1.75	0	0.25	1.25	1	0	0.25	1.25	0.25	0.5	0.25	0.25	0.5	0.25			0.25	0	0	0	0.5	0.25	0	0	0	0	0	0
14	1.5	1.25	2.25	0	0.5	1.75	1.75	0.25	0.5	2.25	0.5	1	0.25	0.25	0.75	0.25			0.25	0	0.25	0.25	0.5	0.25	0	0	0	0	0	0
15	1.75	1.75	2.5	0.25	0.5	1.75	1.75	0.5	1	3	1	2.25	0.75	0.25	1	0.75			0.5	0.25	0.25	0.5	0.75	0.25	0	0	0	0	0	0
16	2	2	2.75	0.5	0.75	1.75	2	0.75	2	3.5	2	2.75	1.25	1	1.25	1			0.75	0.25	0.25	0.5	0.75	0.5	0.25	0.25	0.25	0	0	0.25

## Sheet: 6B
#TCRVB11+TCRVa3.2+
RPMI	Asparagine-Deficient-RPMI
26130.7	2710.47
42138.1	3113.34
43293.1	505.904
27078	145.657
22040.3	102.39
97300.6	831.581
28387.1	308.709
34134.4	46724.3
48384.5	997.552
87589.7	34411.4
89097.2	21649.7
77542	19111.2
64152.5
93920.8
77705.2
117155

## Sheet: 6C
% Annexin-V+ PI+ among CD4+TCRVβ11+TCRVα3.2+
iLN		CNS
RPMI	Asparagine-Deficient-RPMI	RPMI	Asparagine-Deficient-RPMI
16.93	18.41	3.61	6.98
13.03	15.32	2.84	4.58
18.06	18.49	2.88	5.53
16.66	20.52	2.16	10.78
20.5	24.06	2.71	9.3
15.23	22.34	1.61	12.5
19.41	21.54	3.18	30.77
16		2.23
13.53		2.89

## Sheet: 6D
MTG gMFI
iLN		CNS
RPMI	Asparagine-Deficient-RPMI	RPMI	Asparagine-Deficient-RPMI
14626.4	13962.9	14884	6710.31
20192	17885.5	13417.6	6563.94
16736	13740.4	20169.4	6444.31
16821.4	14234.5	17250.6	7409.83
14131.4	13507.3	14673.7	9944.6
18280.6	16028.7	15046.5	7968.1
20990.7	14659.4	13598	6435.81
18783.1		13444.7
18430.1		19076.9

## Sheet: 6E
TMRM gMFI
iLN		CNS
RPMI	Asparagine-Deficient-RPMI	RPMI	Asparagine-Deficient-RPMI
3541.38	2365.57	1132.09	811.95
4941.15	2966.74	1110.78	684.5
3918.76	3076.31	1421.1	616.04
2872.43	2451.56	1069.48	876.99
3389.59	2556.74	1098.74	848.08
3940.57	1810.2	1031.2	575.57
3726.83	2089.08	1094.25	565.28
2430.84		944.21
3256.81		933.31
