# Supplementary material for: Depletion of extracellular asparagine impairs self-reactive T cells and ameliorates autoimmunity in a murine model of multiple sclerosis
Source: eLife. 2026 Jul 8;14:RP107745. doi: 10.7554/eLife.107745 (PMC13345630; doi:10.7554/eLife.107745)
Supplement: Figure 6—source data 1. [file elife-107745-fig6-data1.xlsx]

## Sheet: 6A
EAE Scores
	Cntrl																				PEG-ASP
0	0	0	0	0	0	0	0	0	0	0	0	0	0	0	0	0	0	0	0	0	0	0	0	0	0	0	0	0	0	0	0	0	0	0	0	0	0	0	0	0
1
2
3
4
5
6
7
8
9
10	0.5	0	0	0	0	0.5	0	0	0	0	0	0	0	0.25	0	0	0	0	1.5	0	0	0	0	0	0	0	0	0	0	0	0	0	0	0	0	0	0	0	0	0
11	0.5	0.5	0	0	0.5	1	0	0	0	0	0	0	0	1	0.25	0	0	0.25	3	0	0	0	0	0	0	0	0	0	0	0	0	0	0	0	0	0	0	0	0	0
12	0.5	1	0.5	2.5	1	1.5	0.5	0.5	1	0.5	0	0	0	2	0.5	1	0	0.5	3.5	0	0	0	0	0	0	0	0	0	0	0	0	0	0	0	0	0	0	0	0	0
13	2	2.5	1.5	3	2.5	3	2	2.5	2	1	0.25	0.25	1	3	2.5	1.5	0	1.5	3.5	0	0	0	0.5	0	0	0	0	0	0	0	0	0	0	0	0	0	0	0	0	0
14	3	3	2	3	2.5	3.5	2.5	3	2.5	2.5	1	0.5	2	3.5	2.5	2.5	0.25	3	3.5	1	0	0	0.75	0	0	0	0	0	0	0	0	0	0	0	0	0	0	0	0	0
15	3	3	2	2.75	2.5	3.25	2.25	3	3	3	1.5	0.75	3	3.5	2.75	3.5	1.25	3.5	3.5	1.5	0	0	2.5	0	0	0	0	0	0	0	0	0	0.25	0	0	0	0	0	0	0
16	3	2.5	2	2.75	2	3.25	2	3	3	3	2	1	3.25	3.75	2.75	3.75	2	3.5	3.75	2.25	0	0	3	0	0	0	0	0	0	0	0.25	0.25	0.25	0	0	0	0	0	0	0.25
17	3	2.5	1.5	2.75	2	2.75	2	3	2.5	2.5	2.5	1.5	3.25	3.75	2.75	3.75	3	3.25	3.75	3.5	0	0	3	0	0.5	0	0.5	0	0	0	1	0.25	0.5	0	0	0	0	0	0	0.25
18	3	2	1.5	2	2	2.75	2	2.5	2	2	2.5	1.5	3	3.75	2.75	3.75	3	3.25	3.75	3	0	0	3	0	0.5	0	0.5	0	0	0	2.5	0.25	0.75	0	0.5	0	0	0.25	0.25	0.25
19	2.5	1.5	1.5	1.5	1.5	2.5	1.5	2.25	1.5	1.5	2.5	1.25	2.5	3.75	2.25	3.25	3	2.75	3.75	2.5	0.5	0	3	0	1	0	0.5	0	0	0	3	0.25	0.75	0	0.75	0	0	0.25	0.25	0.25
20	2.5	1.5	1	1.5	1.5	2.5	1.5	2	1.5	1.5	2.5	1.25	2.5	3.75	2	3.25	2.5	2.5	3.75	2.5	0.5	0.5	3	0	2	0	0.5	0	0	0	3	0.5	0.75	0	0.5	0	0	0.25	0.25	0.25
21	2.5	1.5	0.5	1	1	2.25	1.5	1.75	1	1.5	2.25	0.75	2.25	3.5	2	2.5	2.25	2.25	4	2.25	0	0.5	2.5	0	2.5	0	0	0	0	0	3	1	1	0	0.5	0	0.25	0.25	0.5	0.5
22	2.5	1.5	0.5	1	0.5	2	1.5	1.5	1	1.5	2	0.75	2	3.25	1.75	2.5	2.25	2.25		2	0	1	2.5	0	3	0	0	0	0	0	2.5	1	1	0	0.25	0	0.25	0.25	0.5	1
23	3	1.5	0.5	1	0.5	2	1.5	1	1	1	2	0.75	2	3.25	1.75	2.5	2.25	2.5		2	0	0.5	2	0	3	0	0	0	0	0	2	0.75	1.5	0	0.25	0.25	0.25	0.25	1.5	2
24	3.25	1.5	0.5	1	0.5	2	1.5	1	1	1	2	0.75	1.75	3.25	1.75	2.5	2	2.5		1.75	0	0.5	1.75	0	2.75	0	0	0	0	0	1.75	0.75	1.5	0	0.25	0.5	0.25	0.25	2	2.5
25	2.75	1.5	0.5	1	0.5	2	1.5	1	1	1	2	0.5	1.5	3.25	1.75		1.75	2.5		1.75	0	0.5	1.5	0	2.5	0.5	0	0	0	0	1	0.5	1.75	0	0.5	0.75	0.25	1	2	3.25
26	2	1	0.5	0.75	0.5	2	1.5	1	0.5	0.5	1.75	0.5	1.5	3	1.75		1.5	2.5		1.75	0	1	1	0	2	0.5	0	0	0	0	0.75	0.25	2	0	0.5	1	0.25	1.75	2
27	1.75	1	0.5	0.5	0.5	2	1.5	1	0.5	0.5	1.75	0.5	1.5	3	1.75		1.5	2.25		1.75	0	1.5	0.5	0	2	0.5	0	0	0	0	0.75	0.25	2	0	1.25	0.75	0.25	2	3
28	1.5	1	0.5	0.5	0.5	1.5	1.5	1	0.5	0.5	1.75	0.5	1.5	3	1.5		1.5	2		1.75	0	2	0.5	0	2	0.5	0	0	0	0	0.75	0.25	2	0	1.75	0.5	0.25	2	3
29	1.5	1	0.5	0.5	0.5	1.5	1.5	1	0.5	0.5	1.75	0.5	1.25	2.75	1.5		1.5	2		1.75	0		0.5	0	2	0.25	0	0	0	0	0.75	0.25	2	0	1.25	0.5	0.25	2	2.75
30	1.25	1	0.5	0.5	0.5	1.5	1.5	1	0.5	0.5	1.75	0.5	1.25	2.75	1.5		1.5	2		1.75	0		0.5	0	1.75	0.25	0	0	0	0	0.75	0.25	2	0	0.75	0.5	0.25	2	2.75
31	1.25	1	0.5	0.5	0.5	1.5	1.5	1	0.5	0.5	1.75	0.5	1	2.75	1.5		1.5	1.75		1.75	0		0.5	0	1.5	0.25	0	0	0	0	0.75	0.25	2	0	0.75	0.5	0.5	2	2.5
32	1.25	1	0.5	0.5	0.5	1.5	1.5	1	0.5	0.5	1.75	0.25	1.25	3	1.5		1.5	1.75		1.75	0		0.5	0	1.5	0.25	0	0	0	0	0.75	0.25	1.75	0	0.5	0.5	0.5	1.75	2.25
33	1.25	1	0.5	0.5	0.5	1.5	1.5	1	0.5	0.5	1.75	0.25	1.25	3	1.5		1.5	1.75		1.75	0		0.5	0	1.25	0.25	0	0	0	0	0.5	0.25	1.75	0	0.5	0.5	0.75	1.75	2
34	1.5	1	0.25	0.5	0.5	1.5	1.5	1	0.5	0.5	1.75	0.25	1.25	3	1.5		1.5	1.75		1.75	0		0.5	0	1.25	0	0	0	0	0	0.5	0.25	1.75	0	0.25	0.5	1.25	1.75	2
35	1.5	1	0.25	0.5	0.5	1.5	1.5	1	0.5	0.5	1.75	0.25	1.25	3	1.5		1.5	1.75		1.75	0		0.5	0	1.25	0	0	0	0	0	0.25	1	1.75	0	0.5	0.5	1.25	1.75	2.25
36	1.5	1.25	0.25	0.25	0.5	1.5	1.5	1.5	0.5	0.5	2	0.25	1.5	3	1.75		1.75	1.75		2	0		0.5	0	1.25	0	0	0	0	0	0.5	1.5	1.5	0	0.75	1	1.25	2	2

## Sheet: 6B
Mean Max Score
PBS Control	PEG-ASP
2.5	3
1.5	1.75
3.25	2
3.75	1.75
2.75	1.25
3.75	1.25
3	2
3.5	3
3.75	3.25
3.5	0.5
3.25	2
3	3
2	3
2.75	0.5
2.5	0.5
3.5
2.5
3
3
3

## Sheet: 6C
Mean Day of Onset
PBS Control	PEG-ASP
13	16
13	16
13	15
10	18
11	23
12	21
14	18
12	18
10	16
14

## Sheet: 6D
	Cntrl																				PEG-ASP
0	0	0	0	0	0	0	0	0	0	0	0	0	0	0	0	0	0	0	0	0	0	0	0	0	0	0	0	0	0	0	0	0	0	0	0	0	0	0	0	0
1
2
3
4
5
6
7
8
9	0	0	0	0	0	0	0	0	0	0	0	0	0	0	0	0	0	0	0	0	0	0	0	0	0	0	0	0	0	0	0	0	0	0	0	0	0	0	0	0
10	0	0	0	0	0.25	0	0	0.25	0	0	0	0	0	0.25	0.25	0	0	0	0.25	0	0	0	0	0	0	0	0	0	0	0	0	0	0	0	0	0	0	0	0	0
11	0	0	0	0	0.25	0.25	0	0.25	0.25	0	0	0	0	0.5	0.5	0	0.25	0	0.25	0	0	0	0	0	0	0	0	0	0	0	0	0	0	0	0	0	0	0	0	0
12	0.25	0	0	0.25	0.25	0.75	0	0.5	0.25	0	0	0	0.25	0.5	0.75	0.25	0.25	0.25	0.25	0	0	0	0	0	0	0.25	0	0	0	0	0	0	0	0	0	0	0	0	0	0
13	0.5	0	0	2	2	2	0	1	1	0	0.25	0	0.5	1	1.25	1	0.75	0.25	0.5	0.25	0	0	0.25	0	0	1	0	0	2	0	0	0	0	0	0	0	0	0	0.25	0
14	1.75	0.5	0.25	3	2.5	3	0.5	2.5	2.5	1	1	1	1.25	1.75	1.25	1.5	0.75	0.5	1	0.25	0	0.25	0.5	0	0	2.25	0	0	2.25	0.25	0	0	0	0	0	0.25	0	0	0.25	0
15	2.5	2	0.5	3.25	3.25	3.25	1.75	3.25	3.25	2.25	2	2	2.75	3	1.75	2.5	1	1.5	2	0.5	0	1	0.5	0	0	3	0	0	2.5	0.25	0.5	0.5	0.25	0	0.25	0.25	0.25	0	0.5	0
16	3	2	1	3.25	3.25	3.25	2.25	3.25	3.5	2.75	2.25	2.25	3	3	2	3	1.5	2	2.5	1.25	0	1	2.25	0.25	0	3.25	2.5	0	2.5	0.5	0.75	0.5	0.5	0	0.25	0.5	0.25	0	1	0
17	3.25	3	2.25	3.25	3.25	3.25	2.75	3.25	3.5	3.25	2.25	2.25	3	3	2	3	1.75	2.25	2.75	2.75	0.25	1	3	0.5	0	3.25	3	0.25	2.5	0.5	1	0.75	1	0	0.25	0.75	0.5	0	2	0.25
18	3.25	3.25	2.75	3.25	3.25	3.25	2.75	3	3.5	3	2.25	2.25	2.75	3	2	2.75	2.25	2.5	2.75	3	0.25	1	3	0.5	0.25	3.25	3.25	1.75	2.5	0.75	1.5	1	1.5	0.25	0.25	0.75	0.5	0	2.5	0.5
19	3.25	3	3	3.25	3	3.25	2.75	3	3.25	2.75	2	2	2.5	2.75	2	2.5	2.25	2.25	2.5	3	0.25	1.25	3	0.5	1.75	3.25	3.25	2	2.75	1.25	2	1.5	2	0.25	0.5	0.75	0.5	0.25	2.25	0.75
20	3.25	3.25	3	3	2.75	3.25	2.25	2.75	3.25	2.25	1.5	2	2.25	2.25	1.25	2.25	2	2	2.25	2.5	0	1	3	0.5	2.75	3	3.25	2	3	2	2	1	2	0.75	0.5	0.5	0.5	0	2	1.25
21	3	3	2.75	3	2.75	3.25	2	2.5	3	2	1.25	2	2	2	1	2	2	2	2	2.25	0	0.75	3	0.5	3	2.75	3.25	2	3	2	2	0.75	1.75	1	0.25	0.5	0.5	0	1.75	1.75
22	2.75	3	2.5	3	2.75	3	1.75	2.25	2.75	2	1.25	2	1.75	2	1	1.75	1.75	2	1.75	2.25	0	0.5	3	0.25	2.75	2.75	3.25	2	3	1.75	2	0.5	1.75	1.5	0.25	0.5	0.25	0	1.75	1.75
23	2.75	3	2.25	3	2.5	2.75	1.5	2.25	2.75	1.75	1.25	1.75	1.75	2	1	1.75	1.75	1.75	1.75	2.25	0	0.5	3	0.25	2.5	2.75	3	2	2.75	1.5	2	0.5	1.75	1.75	0.25	0.25	0.25	0	1.5	1.5
24	2.75	2.75	2	3	2.25	2.75	1.5	2.25	2.75	1.75	1.25	1.75	1.75	2	1	1.5	1.75	1.5	1.5	2	0	0.75	3	0.25	2.25	2.75	3	2	2.75	1.5	1.75	0.5	1.5	1.75	0.25	0.25	0.25	0	1.5	1.25
25	2.5	2.75	1.75	3	2	2.75	1.25	2.25	2.5	1.5	1.25	1.5	1.5	1.75	1	1.5	1.75	1.5	1.5	2	0.25	0.75	2.75	0	2.25	2.5	3	1.75	2.5	1.25	1.5	0.25	1.25	1.5	0.25	0.25	0.25	0	1.5	1
26	2.75	2.75	1.75	3	1.75	2.75	1.25	2.25	2.5	1.5	1.25	1.5	1.5	1.75	1	1.25	1.75	1.5	1.25	2	0.25	0.75	2.75	0	2.5	2.5	3	1.75	2.5	1	1.5	0.25	1.25	1.5	0.25	0.25	0.25	0	1.5	0.75
27	2.75	2.5	1.75	3	1.75	2.75	1.25	2	2.5	1.5	1.25	1.5	1.25	1.5	1	1.25	1.5	1.25	1.25	1.75	0.5	0.75	2.75	0	2.25	2.25	3	1.75	2.25	0.75	1.25	0.25	1.25	1.5	0	0.25	0.25	0	1.25	0.75
28	2.5	2.5	2	3	1.5	2.75	1.25	2	2.5	1.5	1.25	1.5	1.25	1.5	1	1.25	1.5	1.25	1.25	1.75	0.5	0.75	2.75	0	1.75	2	3	1.75	2	0.5	1.25	0.25	1.25	1.5	0	0.25	0.25	0	1.25	0.75
29	2.75	2.5	2	3	1.75	2.75	1.25	1.75	2.5	1.5	1.25	1.5	1.25	1.5	1	1.25	1.25	1.25	1.25	1.75	0.5	0.75	2.75	0	1.5	2	3	1.75	2	0.5	1.25	0.25	1.25	1.25	0	0.25	0.25	0	1.25	0.75
30	2.75	2.25	2.25	3	1.75	2.75	1.25	1.75	2.5	1.5	1.25	1.5	1.25	1.5	1	1.25	1.25	1.25	1.25	1.75	0.25	0.5	2.75	0.25	1.25	2	3	1.5	1.75	0.5	1.25	0.25	1.25	1.25	0	0.25	0.25	0	1.25	0.75

## Sheet: 6E
Mean Max Score
PBS Control	PEG-ASP
3.25	0.5
3.25	1.25
3	3
3.25	0.5
3.25	3
3.25	3.25
2.75	3.25
3.25	2
3.5	3
3.25	3
2.25	2
2.25	1.5
3	2
3	1.75
2	0.5
3	0.75
2.25	0.5
2.5	0.25
2.75	2.5
3	1.75

## Sheet: 6F
Mean Day of Onset
PBS Control	PEG-ASP
12	17
14	14
14	13
12	16
10	18
11	12
14	16
10	17
11	13
14	14
13	15
14	15
12	15
10	18
10	15
12	14
11	15
12	19
10	13
13	17

## Sheet: 6I
	pTH17 Control RPMI												pTH17 Asparagine-deficient RPMI
0	0	0	0	0	0	0	0	0	0	0	0		0	0	0	0	0	0	0	0
1
2
3
4
5
6
7	0	0	0	0	0	0	0	0	0	0	0		0	0	0	0	0	0	0	0	0	0
8	0	0	0	0	0	0	0	0	0	0	0		0	0	0	0	0	0	0	0	0	0
9	0	0	0	0	0	0	0	0	0	0	0		0	0	0	0	0	0	0	0	0	0
10	0	0	0	0.25	0.25	0.25	0	0	1	0	0		0	0	0	0	0	0	0	0	0	0
11	0	0.25	0.25	0.25	0.25	0.25	0	0.25	2	0	0		0	0	0.25	0	0	0	0	0	0	0
12	0.25	0.25	0.5	0.5	0.5	0.5	0.5	0.5	2.5	0.25	0.25		0	0	0.25	0	0	0	0.25	0	0	0
13	0.5	0.5	1	1	0.5	1	0.5	1	3	0.25	0.5		0	0	0.5	0	0	0	1.25	0	0.25	0
14	1.75	0.75	2.25	2	1.75	2	0.75	1	3	0.25	0.75		0	0	0.5	0	0	0	2	0	0.25	0
15	2	1.75	2.75	2.25	2	2	0.5	1	3	0.25	1		0	0	0.75	0	0.25	0	2.25	0	0.5	0
16	2.25	2.25	3.25	2.5	2.25	2.25	0.5	1	3	0.5	1		0	0	0.75	0	0.5	0	2.5	0	0.5	0
17	2.5	2.75	3.5	2.5	2.5	2.25	0.5	0.75	3	0.5	1		0	0	0.75	0	0.5	0	2.5	0	0.5	0
18	2.5	2.75	3.75	2.75	2.75	2.25	0.5	0.75	3.25	0.5	1		0	0	0.5	0	0.25	0	2.25	0	0.25	0
19	2.5	2.75	3.75	2.75	2.75	2.5	0.25	0.5	3	0.25	0.75		0	0	0.25	0	0.25	0	2	0	0.25	0
20	2.25	2.75	3.75	2.5	3	2.5	0.25	0.25	2.75	0.25	0.5		0	0	0.25	0	0.25	0	1.75	0	0.25	0

## Sheet: 6J
Mean Max Score
RPMI	Asn Deficient RPMI
2.5	0
2.75	0
3.75	0.75
2.75	0
3	0
2.5	0.5
0.75	2.5
1	0
3	0.25
0.5	0
1

## Sheet: 6K
Frequency %TCRVbeta11+TCRValpha3.2
RPMI	Asn Deficient RPMI
74.06	74.73
75.79	41.79
73.74	61.25
76.51	53.08
77.32	60.26
84.44	44.94
83.07	43.63
80.64	29.42
82.55	14.8
83.88	13.96
67.08	36.06
76.88	17.38
84.89
75.71
78.32
80.68

## Sheet: 6L
% Annexin-V+ PI- among CD4+TCRVβ11+TCRVα3.2+
iLN		CNS
RPMI	Asparagine-Deficient-RPMI	RPMI	Asparagine-Deficient-RPMI
14.16	25.97	12.42	11.63
10.72	22.31	10.37	11.24
16.17	22.97	11.89	23.44
9.63	23.92	11.35	22.84
13.42	19.5	14.27	27.91
12.61	17.83	7.59	18.75
14.14	22.87	10.37	15.38
13.14		7.33
13.21		9.15

[truncated: 3 more sheets: 6M, 6N, 6O]
